# Supplementary material for: Amberlyst-15H Cu( ii )-catalyzed diazotization–azidation–cycloaddition: a streamlined route to triazoles from aliphatic amines
Source: Royal Society of Chemistry journal article supplement (doi:10.1039/d5nj00813a), 2025-01-01
Supplement: d5nj00813a1.xlsx [file d5nj00813a1.xlsx]

## Sheet: GCMs (version 1)
GCM calculations
					catalyst Loss consideration		Parameter	Description	19.7431
Reagents	Amount(in mg)	Mw			0.03		Mass of Product	Final desired product mass (mg)
Amberlyst	200	>1000					Total Mass of Reagents	Sum of all reactants (mg)
CuSO4	50	159	e-factor	19.7431			Total Mass of Solvents	Sum of all solvents (mg)
n-BuNH2	730	93	RME	0.501742			Total Catalyst Mass Used	Sum of catalysts (Amberlyst + CuSO₄ or Cu(CH₃CN)₄)
NaNO2	680	68	gRME	0.0482089	0.0481968		Catalyst Loss (3%)	Percentage loss per cycle (fixed as 0.03)
NaN3	650	65
Propargylalcohol (POH)	560	56
							Reaction 1
Solvent							Component	Mass (mg)
H2O	8000	18					Product (Triazole)	1440
EtOAc	19000	88.11					Reagents	730 + 680 + 650 + 560 = 2620
							Solvents	8000 + 19000 = 27000
Product							Catalysts	200 + 50 = 250
Triazole (3)	1440	155.2
							Reaction 2
Reagents	Amount(in mg)	Mw					Component	Mass (mg)
Amberlyst	200	>1000					Product (Triazole)	1400
Cu(CH3CN)4	100	159	e-factor	18.8107			Reagents	920 + 650 + 560 = 2130
n-BuCl	925	93	RME	0.574949			Solvents	4300 + 20000 = 24300
NaNO2	0	68	gRME	0.0504777	0.0504614		Catalysts	200 + 100 = 300
NaN3	650	65
Propargylalcohol (POH)	560	56					Reaction 3
							Component	Mass (mg)
Solvent							Product (Rufinamide)	1833.37
H2O	4300	18					Reagents	1430 + 680 + 650 + 560 = 3320
EtOAc	20000	88.11					Solvents	250 + 26800 = 27050
DMF	1000						Catalysts	200 + 50 = 250
Product								0.0529521
Triazole (3)	1400	155.2					Reaction 4
							Component	Mass (mg)
Reagents	Amount(in mg)	Mw					Product (Rufinamide Precursor)	2460
Amberlyst	200	>1000					Reagents	1430 + 680 + 650 + 980 = 3740
CuSO4	50	159	e-factor	15.7049			Solvents	300 + 25000 = 25300
2,6 difluorobenzylamine	1430	134.13	RME	0.513445			Catalysts	200 + 50 = 250
NaNO2	680	68	gRME	0.0598628	0.0598482
NaN3	650	65
propiolamide	560	69.06
Solvent
H2O	250	18
EtOAc	26800	88.11
Product
Rufinamide (9b)	1833	238.19
Reagents	Amount(in mg)	Mw
Amberlyst	200	>1000
CuSO4	50	159	e-factor	10.9065
2,6difluorobenzylamine	1430	134.13	RME	0.616541
NaNO2	680	68	gRME	0.0839877	0.0839662
NaN3	650	65
Ethylpropiolate	980	98.03
Solvent
H2O	300	18
EtOAc	25000	88.11
Product
Rufinamide precursor (9a)	2460	267
